# Supplementary material for: Transgelin gene is frequently downregulated by promoter DNA hypermethylation in breast cancer
Source: PubMed Central journal article supplement (PMC4587865; doi:10.1186/s13148-015-0138-5), 2015-09-28
Supplement: 13148_2015_138_MOESM4_ESM.pdf [file 13148_2015_138_MOESM4_ESM.pdf]

## Supplementary Tables

**Table S1.** Number of probe sets affected by AZA treatment

|                   | MDA-MB-231 |      | MCF7 |      | MCF-12A |      |
|-------------------|------------|------|------|------|---------|------|
| <i>P</i> values   | UP         | DOWN | UP   | DOWN | UP      | DOWN |
| <i>P</i> < 0.05   | 4284       | 3679 | 3993 | 4634 | 2981    | 2321 |
| <i>P</i> < 0.01   | 4253       | 3654 | 3903 | 4531 | 2868    | 2074 |
| <i>P</i> < 0.001  | 3832       | 3282 | 3044 | 3061 | 2081    | 1309 |
| <i>P</i> < 0.0001 | 2346       | 1823 | 1896 | 1329 | 985     | 389  |

\*Numbers of probe sets under given *P* values were determined with class comparison tool of BRB-ArrayTools, which uses random variance model of unpaired t-test. 1.5-fold threshold was used.

**Table S2.** Comparison of significantly altered probe sets with the independent study GSE20713 Dataset

| Gene lists      | Total <sup>a</sup> | Significantly Altered in GSE 20713 <sup>b</sup> |
|-----------------|--------------------|-------------------------------------------------|
| MCF7 UP         | 1145               | 431 (37.6%)                                     |
| MCF7 DOWN       | 1876               | 799 (42.6%)                                     |
| MDA-MB-231 UP   | 913                | 250 (27.4%)                                     |
| MDA-MB-231 DOWN | 1447               | 533 (36.8%)                                     |
| COMMON UP       | 198                | 106 (53.5%)                                     |
| COMMON DOWN     | 262                | 180 (68.7%)                                     |

<sup>a</sup> Total number of up/downregulated probe sets by AZA in indicated cell lines, but not in MCF12A, by 1.5-fold, at *P* < 0.05 in our set up. <sup>b</sup> Number (and percentage) of up/downregulated probe sets also in GSE20713 dataset, *P* < 0.05, by paired t-test.

**Table S3.** Cancer vs. normal analysis of *TAGLN* mRNA in Oncomine database

| <b>Study</b>                 | <b>Cancerous tissue being compared to Normal</b> | <b>P value</b> | <b>Fold Change</b> | <b>Gene Rank (Top % genes)</b> |
|------------------------------|--------------------------------------------------|----------------|--------------------|--------------------------------|
| Richardson Breast 2 (n = 47) | Ductal Breast Carcinoma                          | 1.03E-12       | -5.92              | 0.3                            |
| Turashvili Breast (n = 30)   | Invasive Lobular Breast Carcinoma                | 8.20E-04       | -2.26              | 0.4                            |
|                              | Invasive Ductal Breast Carcinoma                 | 1.50E-02       | -2.95              | 4.9                            |
| Ma Breast 4 (n = 66)         | Ductal Breast Carcinoma in Situ Epithelia        | 2.90E-07       | -2.78              | 0.4                            |
|                              | Invasive Ductal Breast Carcinoma Epithelia       | 4.01E-05       | -2.28              | 1.2                            |
| TCGA Breast (n = 593)        | Mucinous Breast Carcinoma                        | 9.64E-07       | -2.37              | 1.2                            |
|                              | Invasive Ductal Breast Carcinoma                 | 3.48E-38       | -2.70              | 1.5                            |
|                              | Invasive Breast Carcinoma                        | 1.69E-19       | -2.32              | 3.1                            |
|                              | Mixed Lobular and Ductal Breast Carcinoma        | 8.86E-06       | -2.35              | 3.2                            |
|                              | Intraductal Cribriform Breast Adenocarcinoma     | 4.10E-02       | -3.10              | 21                             |
|                              | Invasive Ductal and Lobular Carcinoma            | 4.10E-02       | -2.55              | 23.9                           |
| Sorlie Breast (n = 85)       | Lobular Breast Carcinoma                         | 3.80E-02       | -2.15              | 6.8                            |
|                              | Ductal Breast Carcinoma                          | 3.00E-02       | -2.13              | 15.4                           |
| Perou Breast (n = 65)        | Ductal Breast Carcinoma                          | 1.10E-02       | -2.10              | 8.6                            |
| Curtis Breast (n = 2 136)    | Invasive Ductal Breast Carcinoma                 | 7.15E-50       | -2.30              | 4.7                            |
|                              | Medullary Breast Carcinoma                       | 1.29E-09       | -3.37              | 7.3                            |
|                              | Mucinous Breast Carcinoma                        | 9.39E-14       | -2.59              | 7.5                            |
|                              | Invasive Lobular Breast Carcinoma                | 2.05E-21       | -2.06              | 7.8                            |
|                              | Breast Carcinoma                                 | 5.77E-05       | -2.68              | 8.5                            |
|                              | Invasive Breast Carcinoma                        | 1.68E-04       | -2.62              | 12.0                           |
| Finak Breast (n = 59)        | Invasive Breast Carcinoma Stroma                 | 2.65E-05       | -3.84              | 33.4                           |
